# Supplementary material
Source: Springer Nature journal article supplement (https://www.springermedizin.de/resource/supplementary/13058_2012_3227_MOESM3_ESM.pdf/9703542)

**A**

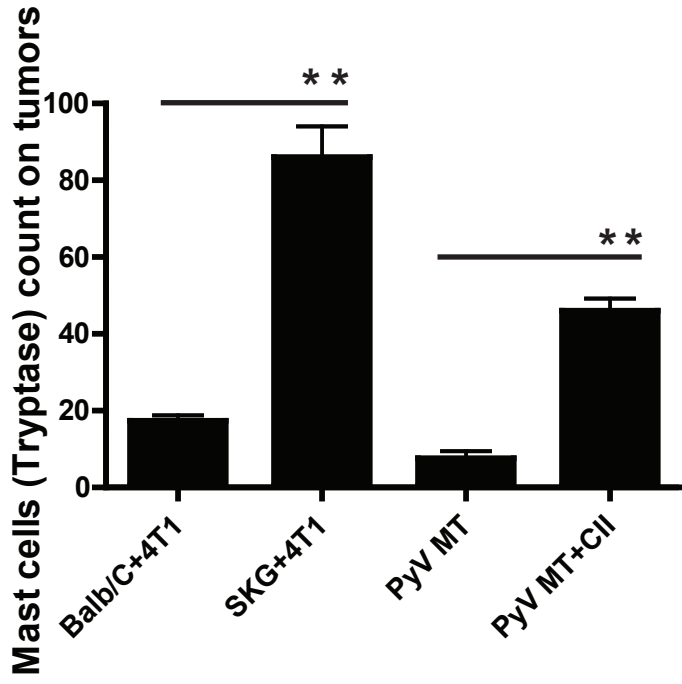

**B**

**Mast cells (Tryptase) on tumor (400X)**

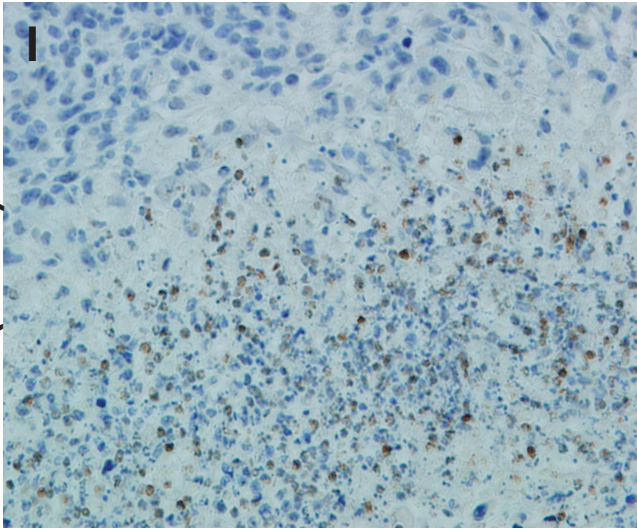

**Balb/C+4T1**

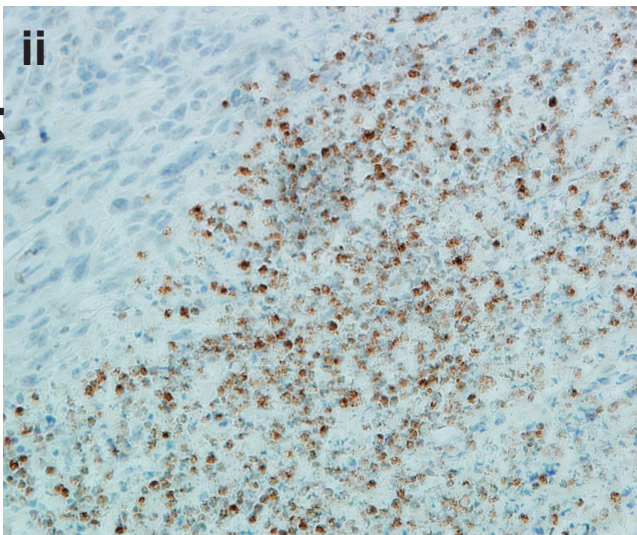

**SKG+4T1**

**C**

**Mast cells (Tryptase) on tumor (400X)**

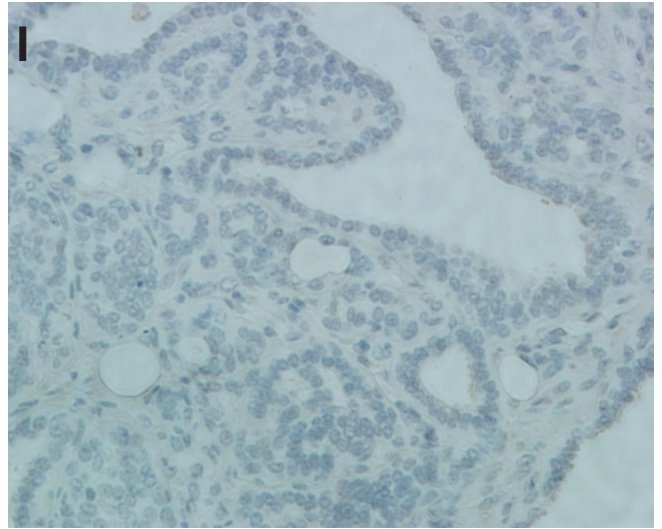

**PyV MT**

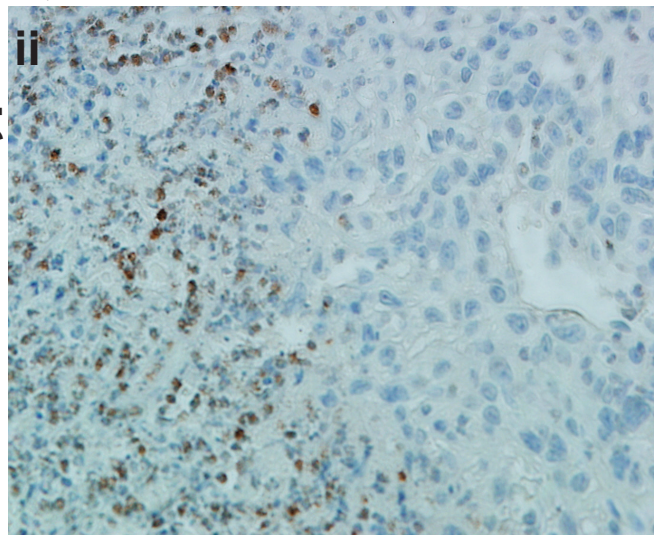

**PyV MT+CII**

Supplement: MOESM3 [file 9703542]
